# Supplementary material
Source: MDPI journal article supplement (https://www.mdpi.com/2227-9040/12/4/64)
Supplement: s1 [file s1]

Archive with 8 entries (8 files):
- Figure S1.pdf
- Figure S2.pdf
- Figure S3.pdf
- Figure S4.pdf
- Figure S5 .pdf
- Figure S6.pdf
- Table S1 - revised.xlsx
- Table S2 - revised.xlsx
