# Supplementary material
Source: MDPI journal article supplement (https://www.mdpi.com/2227-9040/12/4/64)
Supplement: s1 [file s1 › Table S1 - revised.xlsx]

## Sheet: Table 1
	Tabsle S1. Analysis results for the red pigments of ancient potteries
					XRD, wt%									EDS, wt%
	Sample	Color	Dynasty	Location	Quartz	Muscovite	Calcite	Gypsum	Cerussite	Fe2O3	Cinnabar	lead(II,IV) oxide		O	Na	Mg	Al	Si	Ca	Pb	Hg	S	Cu	Fe	P	Cl	K	Ti	Mn	Ba	V
	1	Red	Han	Guyuan	29.5	—	—	70.5	—	—	—	—		35.5024	1.97883	2.38078	9.83232	22.973	6.95683	—	—	2.07159	0.216435	13.1716	—	2.38078	1.82424	0.556547	0.154596	—	—
	2	Red	Han	Guyuan	95.9	—	—	—	—	4.1	—	—		34.2724	2.36474	1.57649	8.79198	25.4967	7.21549	—	—	3.30457	0.272854	12.0359	—	1.45522	2.18284	0.63666	0.394123	—	—
	3	Red	Han	Guyuan	51	19.2	30	—	—	—	—	—		29.5452	2.72192	2.75057	10.2574	25.5001	11.9192	—	—	2.00563	—	10.0568	—	2.23484	2.40675	0.601688	—	—	—
	4	Red	Han	Zhongwei	63.8	—	—	16.8	—	—	20.4	—		43.4931	0.983387	1.92895	5.63556	20.689	13.5027	—	—	10.5525	—	0	0.794274	—	1.70202	0.453871	0.264758	—	—
	5	Red	Han	Zhongwei	0.08	—	—	—	—	—	99.92	—		22.3893	0.180958	0.603192	1.76936	5.87107	2.835	—	49.6829	9.28916	—	2.01064	—	—	0.542873	—	—	4.82554	—
	6	Red	Han	Zhongwei	28.5	28.1	—	21.8	—	—	21.7	—		25.6424	0.529801	0.582781	10.543	18.2781	4.13245	—	26.702	6.88742	0.317881	1.21854	—	—	3.70861	0.238411	—	1.21854	—
	7	Red	Han	Zhongwei	44.5	44.7	—	3.21	—	—	7.6	—		17.2944	1.35969	1.09821	18.225	39.2479	2.32716	—	9.20403	2.09183	—	1.88264	—	—	6.66769	0.6014	—	—	—
	8	Red	Han	Zhongwei	27.5	—	—	—	—	—	—	13.3		23.7812	1.90346	1.71579	12.5467	25.4956	4.20906	23.3241	—	—	—	3.88735	—	—	2.52007	0.616614	—	—	—
	9	Red	Han	Zhongwei	68.5	—	—	—	16.4	—	15.1	—		20.2045	0.413805	0.965546	7.19561	15.8625	3.70126	45.8174	—	—	0.413805	2.13799	1.10348	—	1.86212	0.321849	—	—	—
	10	Red	Tang	Zhongwei	71.1	—	—	—	—	—	—	28.9		21.6022	0.319123	1.06374	3.42525	8.70142	3.82947	57.2081	—	—	0.446772	2.34023	—	—	0.914819	0.148924	—	—	—
	11	Red	Tang	Zhongwei	72.9	—	—	—	—	—	—	27.1		40.4946	0.652881	1.33685	7.64803	19.5864	3.51312	21.7005	—	—		3.23332	—	—	1.43012	0.279806	—	—	0.124358
