# Supplementary material
Source: MDPI journal article supplement (https://www.mdpi.com/2227-9040/12/4/64)
Supplement: s1 [file s1 › Table S2 - revised.xlsx]

## Sheet: Table S2
	Tabsle S2. Analysis results for the white pigments of ancient potteries
					XRD, wt%							EDS, wt%
	Sample	Color	Dynasty	Location	Quartz	Muscovite	Dolomite	Calcite	Cerussite	lead(II,IV) oxide		O	Na	Mg	Al	Si	Ca	Pb	Hg	S	Fe	P	Cl	K	Ti	Mn	Ba	SC	W
	1	White	Han	Guyuan	0.83	0.26	—	98.9	—	—		30.3672	5.31098	1.44577	13.8676	24.8731	9.05817	—	—	1.50478	2.7145	—	5.90109	4.48483	0.472087	—	—	—	—
	2	White	Han	Guyuan	5.1	94.3	—	0.69	—	—		34.6315	1.20876	1.62228	14.6005	33.5908	4.0398	—	—	0.858856	4.07161	—	0.508952	4.26247	0.540761	—	—	—	0.0636189
	3	White	Han	Guyuan	4.4	94.7	—	0.86	—	—		45.33	0.37	1.35	11.39	23.42	8.4	—	—	1.23	3.62	—	—	4.22	0.56	0.11	—	—	—
	4	White	Han	Zhongwei	4.3	92.7	—	—	—	—		49.5219	0.949661	1.05924	12.7839	25.5313	2.26458	—	—	0.255678	2.5933	—	—	4.4561	0.584406	0	0	0	—
	5	White	Han	Zhongwei	49.8	50.2	—	—	—	—		42.04	0.48	1.54	9.32	22.88	5.62	—	8.19	1.6	3.17	—	—	3.77	—	0.14	1.25	—	—
	6	White	Han	Zhongwei	1.96	—	—	—	98.04	—		34.8307	2.21839	2.08979	15.368	28.5819	3.24721	4.91905	—	—	4.34034	—	—	3.76162	0.643013	—	—	—	—
	7	White	Han	Zhongwei	1.09	98.77	—	0.74	—	—		53.9596	0.510687	1.33564	13.6314	22.431	1.84633	—	—	0.274985	2.98556	—	—	2.51415	0.510687	—	—	—	—
	8	White	Han	Zhongwei	38.5	—	61.5	—	—	—		56.6919	0.50134	6.71024	5.05196	11.955	12.8034	—	—	—	3.93359	—	—	1.65828	0.347081	0.347081	—	—	—
	9	White	Han	Zhongwei	64.5	—	35.5	—	—	—		42.039	1.32502	4.7225	9.75076	23.4426	6.96483	1.73271	—	0.271798	5.50392	0.373723	—	2.58208	0.305773	0.985269	—	—	—
	10	White	Tang	Zhongwei	56.2	—	—	18.6	—	—		52.2333	0.454921	1.36476	9.51543	18.0831	11.4488	1.02357	—	0.18955	2.27461	0.985662	—	1.81968	0.303281	0.15164	—	0.15164	—
	11	White	Tang	Zhongwei	36.8	—	—	—	—	9		47.4494	0.915397	2.40716	8.442	21.1219	6.74682	4.37357	—	0.678072	4.64479	—	—	2.74619	0.339036	0.135614	—	—	—
